# Supplementary material for: HIV-specific humoral immune responses by CRISPR/Cas9-edited B cells
Source: PubMed Central journal article supplement — J Exp Med. 2019 Nov 4;216(6):1301–10. doi: 10.1084/jem.20190287 (PMC6547862; doi:10.1084/jem.20190287), 2019-11-04
Supplement: JEM_20190287_sm.pdf [file JEM_20190287_sm.pdf]

Supplemental material

Hartweger et al., <https://doi.org/10.1084/jem.20190287>

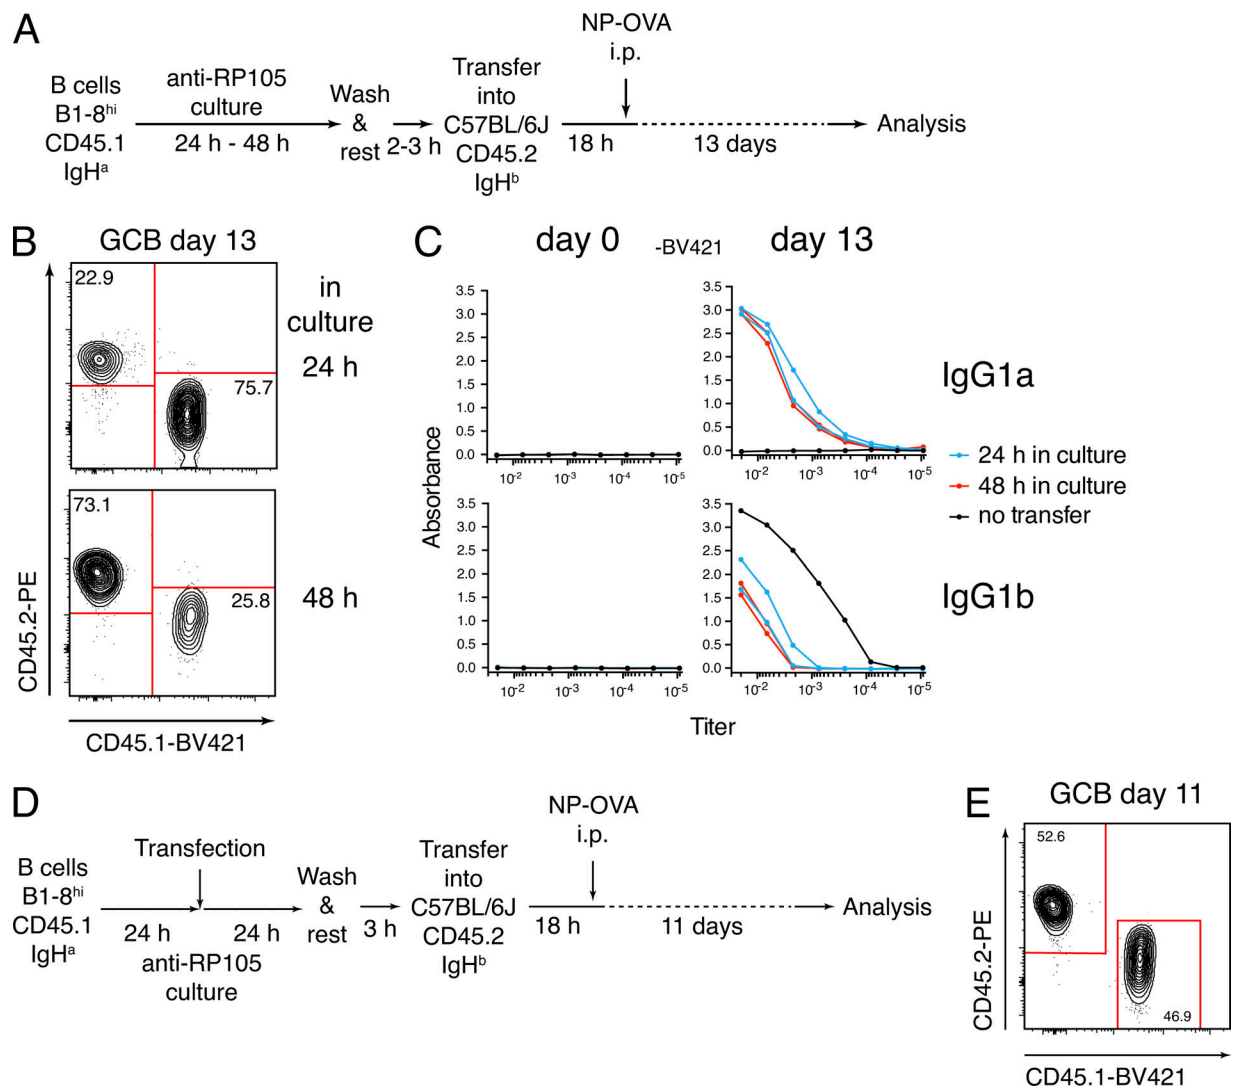

Figure S1. **Cultured B cells participate in humoral immune responses.** (A) Schematic representation of the experimental setup for B and C. B1-8<sup>hi</sup> CD45.1 Igh<sup>a</sup> cells were cultured for 24 or 48 h in the presence of anti-RP105 antibody, then rested for 2–3 h without antibody and then transferred into C57BL/6J (CD45.2 Igh<sup>b</sup>) recipients. 18 h later, mice were immunized with NP-OVA i.p., and mice were analyzed 2 wk later. (B) Flow-cytometric plots gated on CD38<sup>-</sup>Fas<sup>+</sup>GL7<sup>+</sup>IgD<sup>-</sup> GC B cells 2 wk after transfer. (C) Pre-immune (day 0) and day 13 ELISA titers of anti-NP IgG1<sup>a</sup> or IgG1<sup>b</sup>. (D) Schematic representation of the experimental setup for E. B1-8<sup>hi</sup> CD45.1 Igh<sup>a</sup> cells were cultured for 24 h and transfected with plasmid DNA. 24 h after transfection cells were transferred and analyzed as in A. (E) Flow-cytometric plots gated on CD38<sup>-</sup>Fas<sup>+</sup>GL7<sup>+</sup>IgD<sup>-</sup> GC B cells 11 d after transfer. Data (A–E) are representative of two or three independent experiments.

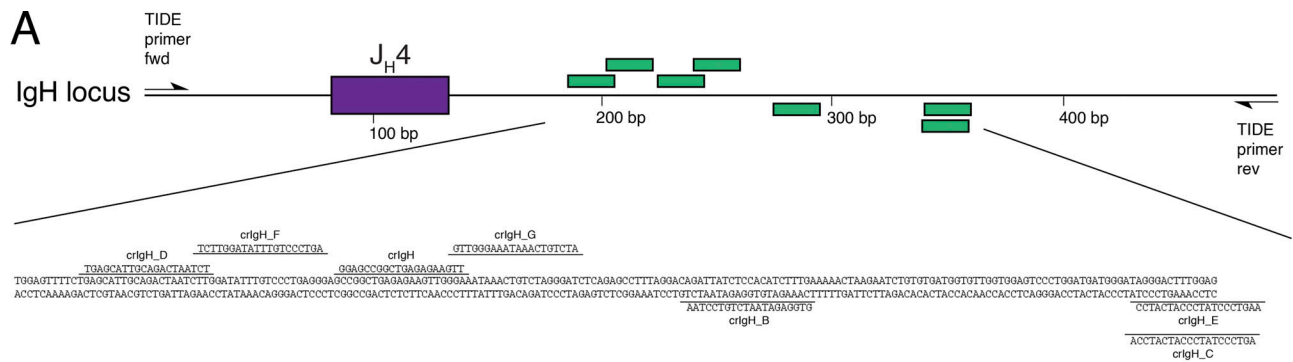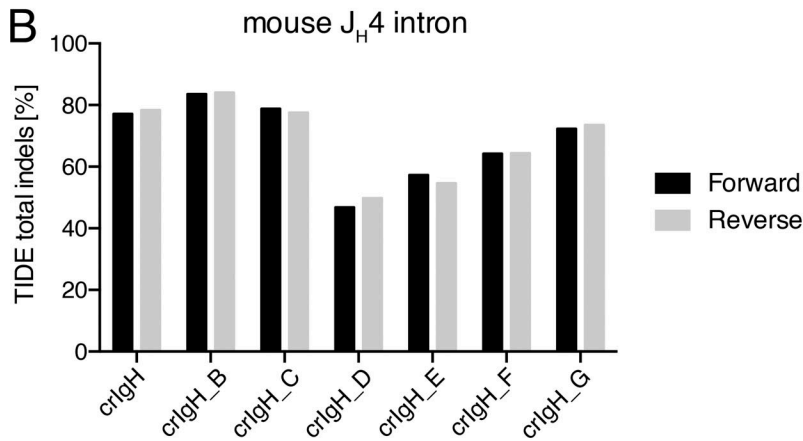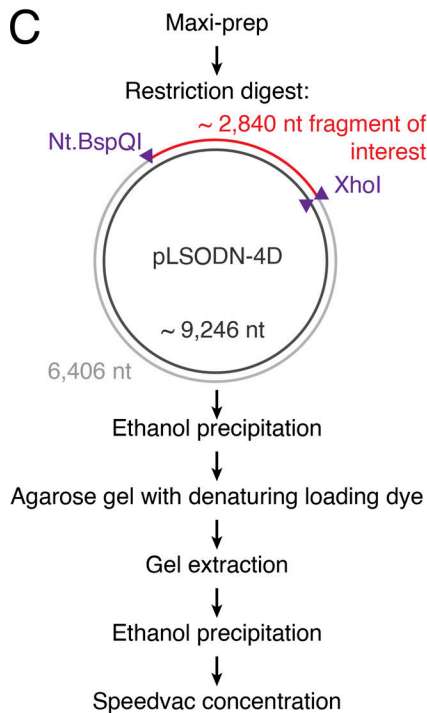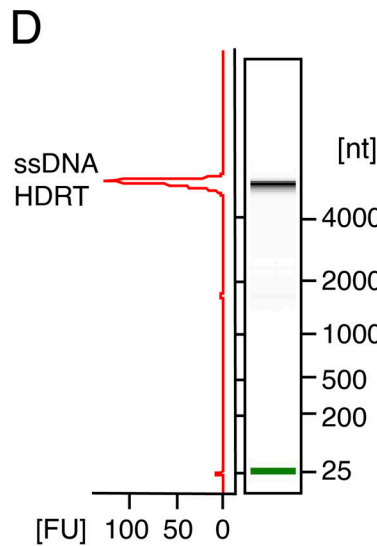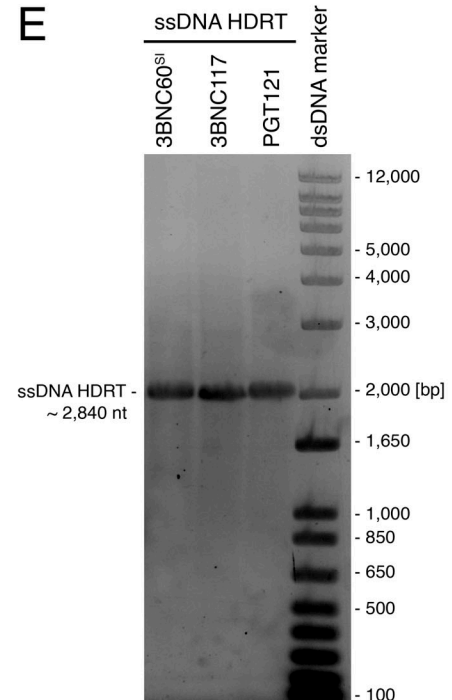

Figure S2. **Identification of optimal mouse *Igh* crRNA and ssDNA HDRT template production.** (A) Schematic representation of the mouse *Igh* locus around J<sub>H</sub>4. Location and sequence of tested guide RNAs is indicated below. (B) TIDE assay comparing the efficiency of creating indels of the crRNAs indicated in A. Forward (fwd)/reverse (rev) indicate sequencing with forward/reverse primers, respectively. Representative of two independent experiments. (C) Flow chart of ssDNA production. HDRT templates were cloned into pLSODN-4D, Maxi-prepared (Maxi prep.), sequence-verified, and digested with restriction enzyme *XhoI* and the nicking endonuclease *Nt.BspQI* to produce three ssDNA fragments of the vector. (D and E) Denaturing loading buffer was used to separate the three fragments by conventional agarose gel electrophoresis as indicated. ssDNA HDRT quality and integrity were verified using (D) Bioanalyzer and (E) agarose gel electrophoresis. Representative of >20 independent preparations. FU, fluorescence units.

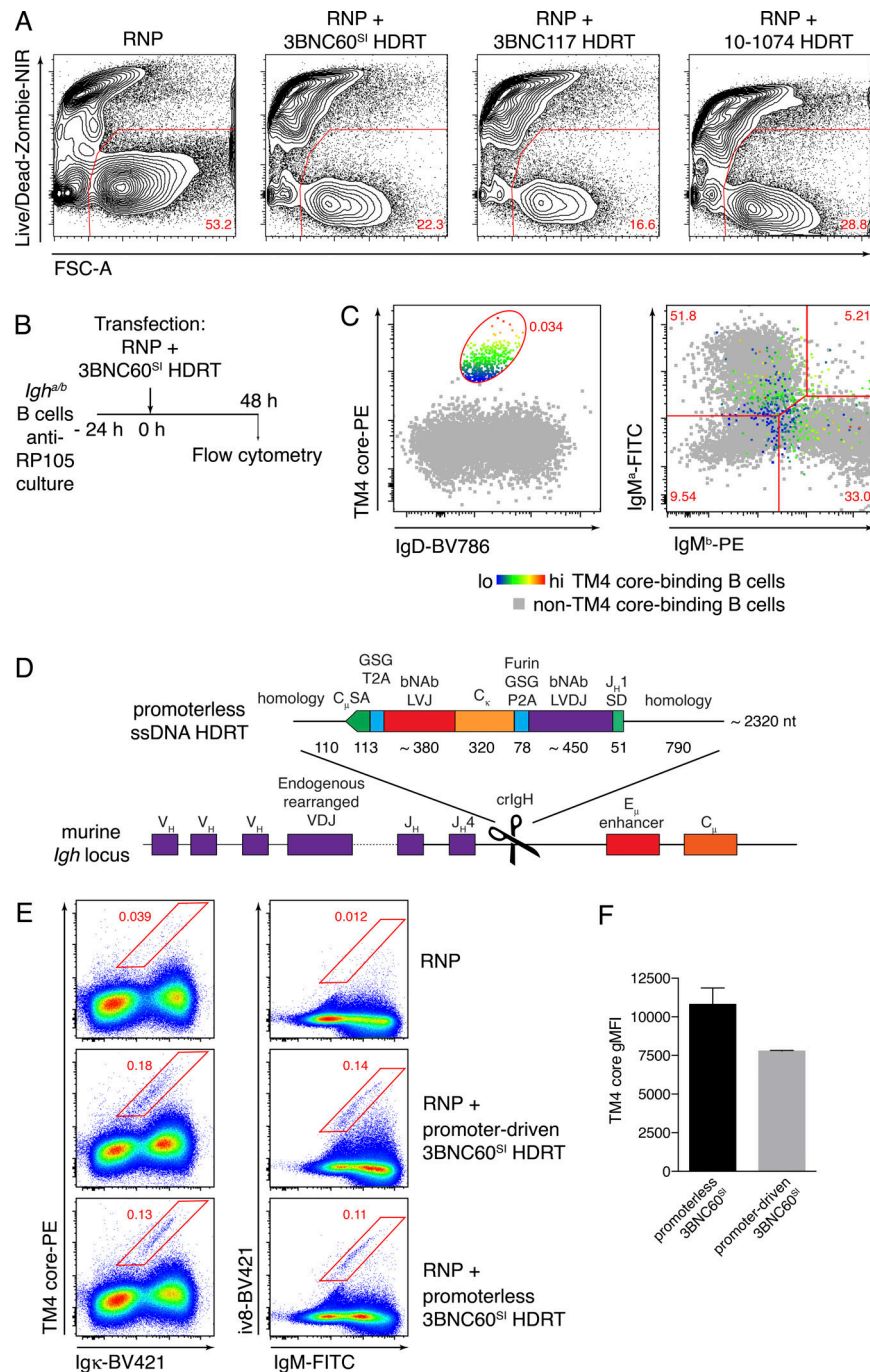

**Figure S3. Cell viability and *Igh* allelic exclusion of bNAb-expressing murine B cells.** (A) Flow-cytometric plots showing percentage of live cells among all events 48 h after RNP ± HDRT transfection. Related to Fig. 2, B and C. NIR, near-infrared dye; FSC-A, forward scatter area. (B) Experimental setup for C. Heterozygous (*Igh<sup>a/b</sup>*) B cells expressing IgH<sup>a</sup> or IgH<sup>b</sup> alleles were activated for 24 h, then transfected with 3BNC60<sup>SI</sup> HDRT and analyzed 48 h later. (C) Overlays of flow-cytometric plots of TM4 core binding cells and nonbinding B cells, both pre-gated on λ<sup>-</sup> B cells. TM4 core mean fluorescence intensity ( $5.89 \times 10^3$  to  $1.28 \times 10^5$ ) is color-mapped onto a TM4 core-binding cell population. Numbers represent the percentage of TM4 core-binding cells among λ<sup>-</sup> B cells (left) or the percentage of TM4 core-binding B cells in the respective gate (right). Concatenate of five technical repeats in two independent experiments is shown B and C. (D) Schematic representation of the promoterless targeting strategy to create bNAb-expressing primary mouse B cells. ssDNA HDRT contained 110 nt 5' and 790 nt 3' homology arms flanking an expression cassette. The 5' homology arm is followed by the 111 nt long splice acceptor site and the first two nucleotides of C<sub>μ</sub> exon 1 and an in-frame self-cleaving *Thosea asigna* virus 2A (T2A) sequence with GSG-linker. Then the leader, variable, and joining regions (LVJ) of the respective antibody light chain, and mouse C<sub>κ</sub>, are followed by a furin-cleavage site, a GSG-linker, and a P2A self-cleaving oligopeptide sequence, the leader, VDJ of the respective antibody heavy chain (LVDJ), and 45 nt of the mouse J<sub>H1</sub> intron splice donor site to splice into downstream constant regions. (E) Flow cytometry of mouse B cells transfected and analyzed as in Fig. 2 B either without template, or promoter-driven template or promoterless HDRT encoding 3BNC60<sup>SI</sup>. The left panel shows cognate antigen binding (TM4 core), and the right panel identifies correctly edited B cells using anti-idiotypic antibody iv8. (F) Geometric mean fluorescence intensity (gMFI) of TM4 core-binding of cells gated as in the left panel of E. Bars indicate mean ± SEM. Representative of two independent experiments.

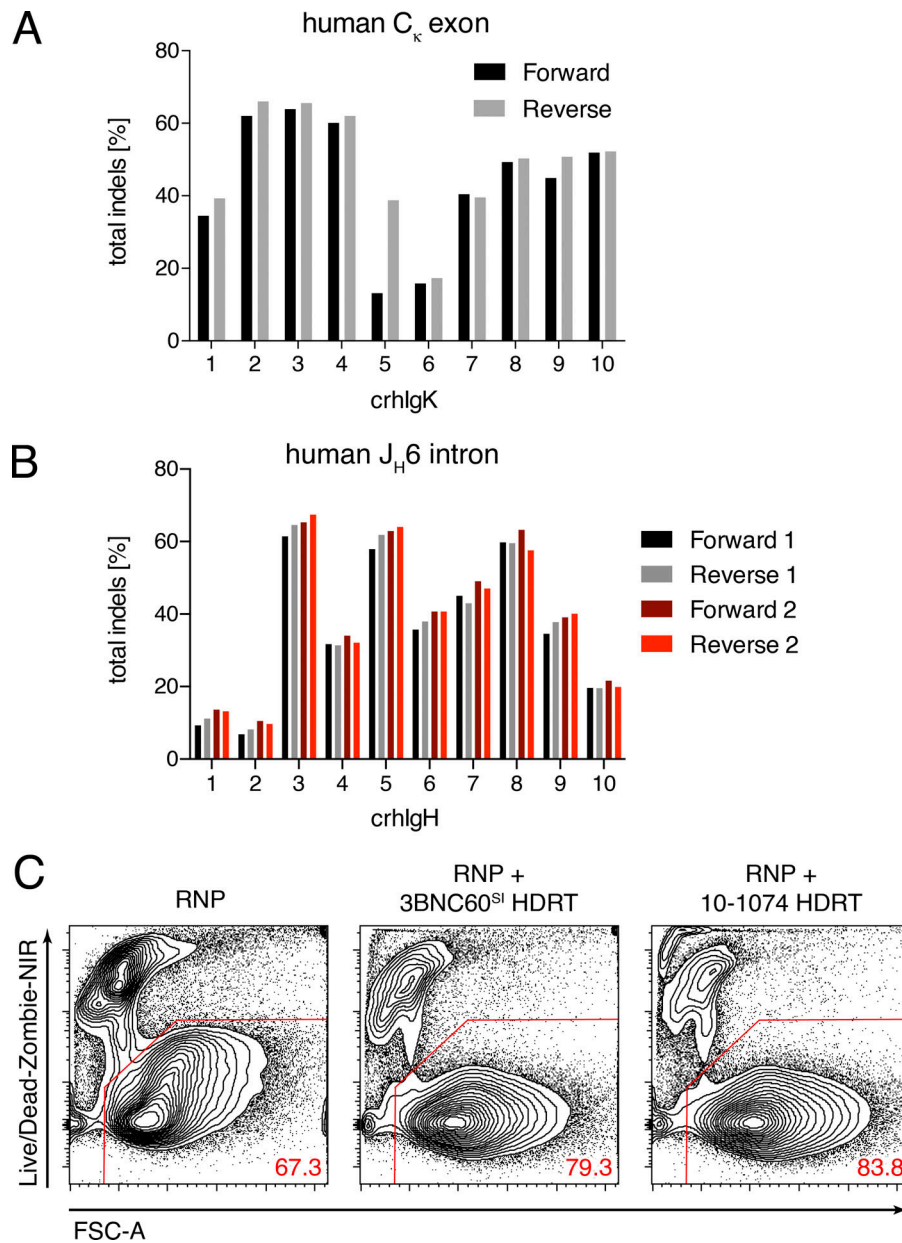

Figure S4. **TIDE analysis and viability of primary human B cells after transfection.** (A and B) TIDE assay 42 h after transfection, comparing the efficiency of creating indels of crRNAs targeting the human *IGKC* exon (A), and TIDE assay using two different primer sets, 24 h after transfection, comparing the efficiency of creating indels of crRNAs targeting the human *IGHJ6* intron (B). Forward/reverse indicate sequencing with forward/reverse primers, respectively. Representative of two independent experiments. (C) Flow-cytometric plots showing percentage of live cells among all events 72 h after RNP ± HDRT transfection. Related to Fig. 4 D. Representative plots of two independent experiments are shown.

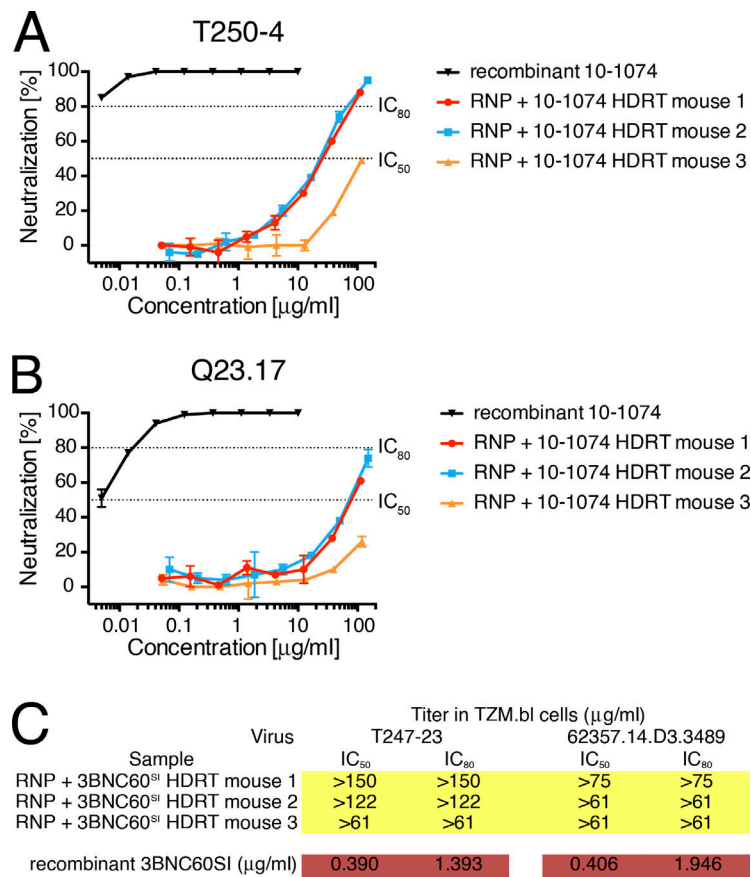

Figure S5. **Serum neutralization of wild-type mice adoptively transferred with edited B cells.** Related to Fig. 4, A and B. **(A and B)** Neutralization curves for HIV strains T240-4 (A) and Q23.17 (B) of data summarized in Fig. 4 E of mice receiving 10-1074-edited B cells and immunized with cognate antigen 10mut. **(C)** HIV neutralization data of mice receiving 3BNC60<sup>SI</sup>-edited B cells and immunized with cognate antigen TM4 core. Combined data from two independent experiments (A–C). Curves indicate mean  $\pm$  SD.

Table S1. **crRNA sequences**

| Name                 | crRNA sequence without PAM | Locus                              |
|----------------------|----------------------------|------------------------------------|
| crIgK <sub>1</sub>   | 5'-GTTCAAGAAGCACACGACTG-3' | Mouse <i>Igkc</i>                  |
| crIgK <sub>2</sub>   | 5'-GTTAACTGCTCACTGGATGG-3' | Mouse <i>Igkc</i>                  |
| crIgH                | 5'-GGAGCCGGCTGAGAGAAGTT-3' | Mouse <i>J<sub>H</sub>4</i> intron |
| crIgH <sub>B</sub>   | 5'-GTGGAGATAATCTGTCTCAA-3' | Mouse <i>J<sub>H</sub>4</i> intron |
| crIgH <sub>C</sub>   | 5'-AGTCCCTATCCCATCATCCA-3' | Mouse <i>J<sub>H</sub>4</i> intron |
| crIgH <sub>D</sub>   | 5'-TGAGCATTGCAGACTAATCT-3' | Mouse <i>J<sub>H</sub>4</i> intron |
| crIgH <sub>E</sub>   | 5'-AAGTCCCTATCCCATCATCC-3' | Mouse <i>J<sub>H</sub>4</i> intron |
| crIgH <sub>F</sub>   | 5'-TCTTGGATATTTGCCCTGA-3'  | Mouse <i>J<sub>H</sub>4</i> intron |
| crIgH <sub>G</sub>   | 5'-GTTGGGAAATAAACTGTCTA-3' | Mouse <i>J<sub>H</sub>4</i> intron |
| crhIgK <sub>1</sub>  | 5'-GGTGGATAACGCCCTCCAAT-3' | Human <i>IGKC</i>                  |
| crhIgK <sub>2</sub>  | 5'-GTGGATAACGCCCTCCAATC-3' | Human <i>IGKC</i>                  |
| crhIgK <sub>3</sub>  | 5'-CTGGGAGTTACCCGATTGGA-3' | Human <i>IGKC</i>                  |
| crhIgK <sub>4</sub>  | 5'-CCTCCAATCGGGTAACTCCC-3' | Human <i>IGKC</i>                  |
| crhIgK <sub>5</sub>  | 5'-ATCCACCTTCCACTGTACTT-3' | Human <i>IGKC</i>                  |
| crhIgK <sub>6</sub>  | 5'-TTCAACTGCTCATCAGATGG-3' | Human <i>IGKC</i>                  |
| crhIgK <sub>7</sub>  | 5'-GATTTCAACTGCTCATCAGA-3' | Human <i>IGKC</i>                  |
| crhIgK <sub>8</sub>  | 5'-TGGGATAGAAGTTATTCAGC-3' | Human <i>IGKC</i>                  |
| crhIgK <sub>9</sub>  | 5'-ATTCAGCAGGCACACAACAG-3' | Human <i>IGKC</i>                  |
| crhIgK <sub>10</sub> | 5'-GGCCAAAGTACAGTGGAAGG-3' | Human <i>IGKC</i>                  |
| crhIgH <sub>1</sub>  | 5'-GTCCTCGGGCATGTTCCGA-3'  | Human <i>J<sub>H</sub>6</i> intron |
| crhIgH <sub>2</sub>  | 5'-TCCTCGGGCATGTTCCGAG-3'  | Human <i>J<sub>H</sub>6</i> intron |
| crhIgH <sub>3</sub>  | 5'-AGGCATCGGAAAATCCACAG-3' | Human <i>J<sub>H</sub>6</i> intron |
| crhIgH <sub>4</sub>  | 5'-CTCAGGTTGGGTGCGTCTGA-3' | Human <i>J<sub>H</sub>6</i> intron |
| crhIgH <sub>5</sub>  | 5'-ACGAGATGCCTGAACAAACC-3' | Human <i>J<sub>H</sub>6</i> intron |
| crhIgH <sub>6</sub>  | 5'-ACCTGAGTCCCATTTTCAA-3'  | Human <i>J<sub>H</sub>6</i> intron |
| crhIgH <sub>7</sub>  | 5'-TCAGCCATCACTAAGACCCC-3' | Human <i>J<sub>H</sub>6</i> intron |
| crhIgH <sub>8</sub>  | 5'-CAAACCAGGGTCTTAGTGA-3'  | Human <i>J<sub>H</sub>6</i> intron |
| crhIgH <sub>9</sub>  | 5'-CTAAGACCCTGGTTTGTTC-3'  | Human <i>J<sub>H</sub>6</i> intron |
| crhIgH <sub>10</sub> | 5'-TCAGGCATCTCGTCCAATG-3'  | Human <i>J<sub>H</sub>6</i> intron |

PAM, protospacer adjacent motif.

Table S3. **Primers for TIDE analysis**

| Forward primer 5' to 3' sequence | Reverse primer 5' to 3' sequence | Comments                                                             |
|----------------------------------|----------------------------------|----------------------------------------------------------------------|
| 5'-CCTGGCCCCATTGTCCTTA-3'        | 5'-GCGTCTCAGGACCTTTGTCT-3'       | For TIDE analysis mouse <i>Igkc</i> , product 483 bp                 |
| 5'-AATGTCTGAGTTGCCAGGG-3'        | 5'-TGTCACAGAGGTGGTCTGA-3'        | For TIDE analysis mouse <i>J<sub>H</sub>4</i> intron, product 495 bp |
| 5'-ATGGCTGCAAAGAGCTCAA-3'        | 5'-GGAAAAAGGGTCAGAGGCCA-3'       | For TIDE analysis human <i>IGKC</i> , product 638 bp                 |
| 5'-TGCCCTGTGATTATCCGAA-3'        | 5'-GAGCTGGAGACCGCAATAG-3'        | For TIDE analysis human <i>IGKC</i> , product 515 bp                 |
| 5'-GCCACTTAGGGCTTTGTT-3'         | 5'-AGCTTCAAGGCACTGAGGTC-3'       | For TIDE analysis human <i>J<sub>H</sub>6</i> intron, product 563 bp |
| 5'-CTACATGGACGTCTGGGGC-3'        | 5'-CTGCTCTCATCAAGACCGGG-3'       | For TIDE analysis human <i>J<sub>H</sub>6</i> intron, product 533 bp |

Table S4. **Flow-cytometric reagents**

| Reagent                            | Target species | Antibody clone | Company/source                   | Catalog no. |
|------------------------------------|----------------|----------------|----------------------------------|-------------|
| CD16/32                            | Mouse          | 2.4G2          | BD Biosciences                   | 7248907     |
| CD4-eF780                          | Mouse          | RM4-5          | Thermo Fisher Scientific         | 47-0042-82  |
| CD8a-eF780                         | Mouse          | 53-6.7         | Thermo Fisher Scientific         | 47-0081-82  |
| NK1.1-eF780                        | Mouse          | PK136          | Thermo Fisher Scientific         | 47-5941-82  |
| F4/80-eF780                        | Mouse          | BM8            | Thermo Fisher Scientific         | 47-4801-82  |
| LY6G (Gr1)-eF780                   | Mouse          | RB6-8C5        | Thermo Fisher Scientific         | 47-5931-82  |
| IgG1-APC                           | Mouse          | A85-1          | BD Pharmingen                    | 560089      |
| CD95 (FAS)-PE-Cy7                  | Mouse          | Jo2            | BD Biosciences                   | 557653      |
| CD45.2-PE                          | Mouse          | 104            | BioLegend                        | 109808      |
| CD45.1-BV421                       | Mouse          | A20            | BioLegend                        | 110732      |
| GL7-FITC                           | Mouse          | GL7            | BD Pharmingen                    | 553666      |
| IgD-BV786                          | Mouse          | 11-26c.2a      | BD Horizon                       | 563618      |
| CD45R/B220-BV605                   | Mouse/human    | RA3-6B2        | BioLegend                        | 103244      |
| CD19-PECy7                         | Mouse          | 6D5            | BioLegend                        | 115520      |
| IgM <sup>a</sup> -FITC             | Mouse          | DS-1           | BD Pharmingen                    | 553516      |
| IgM <sup>b</sup> -PE               | Mouse          | AF6-78         | BioLegend                        | 406208      |
| Ig light chain λ-APC               | Mouse          | RML-42         | BioLegend                        | 407306      |
| Ig light chain κ-BV421             | Mouse          | 187.1          | BD Horizon                       | 562888      |
| IgM Fab-FITC                       | Mouse          | polyclonal     | Jackson ImmunoResearch           | 115-097-020 |
| Zombie NIR                         | N/A            | N/A            | BioLegend                        | 423105      |
| Streptavidin-PE                    | N/A            | N/A            | BD Pharmingen                    | 554061      |
| Streptavidin-BV421                 | N/A            | N/A            | BD Horizon                       | 563259      |
| TM4 core-biotin                    | N/A            | N/A            | In house (McGuire et al., 2014)  | N/A         |
| 10mut-biotin                       | N/A            | N/A            | In house (Steichen et al., 2016) | N/A         |
| Anti-3BNC60 <sup>SI</sup> idiotype | N/A            | Iv8            | In house, this publication       | N/A         |
| Human Fc Block                     | Human          | N/A            | BD Horizon                       | 564220      |
| Ig light chain λ-APC               | Human          | MHL38          | BioLegend                        | 316609      |
| CD19-PECy7                         | Human          | SJ25C1         | BioLegend                        | 363011      |
| IgM-FITC                           | Human          | MHM88          | BioLegend                        | 314506      |
| IgD-BV785                          | Human          | IA6-2          | BioLegend                        | 348241      |
| Ig light chain κ-BV421             | Human          | MHK-49         | BioLegend                        | 316518      |

N/A, not available.

Table S2 is provided online as a separate Excel file and lists gBlock sequences of HDRTs.

## References

- McGuire, A.T., A.M. Dreyer, S. Carbonetti, A. Lippy, J. Glenn, J.F. Scheid, H. Mouquet, and L. Stamatatos. 2014. HIV antibodies. Antigen modification regulates competition of broad and narrow neutralizing HIV antibodies. *Science*. 346:1380–1383. <https://doi.org/10.1126/science.1259206>
- Steichen, J.M., D.W. Kulp, T. Tokatlian, A. Escolano, P. Dosenovic, R.L. Stanfield, L.E. McCoy, G. Ozorowski, X. Hu, O. Kalyuzhniy, et al. 2016. HIV Vaccine Design to Target Germline Precursors of Glycan-Dependent Broadly Neutralizing Antibodies. *Immunity*. 45:483–496. <https://doi.org/10.1016/j.immuni.2016.08.016>
